# Supplementary material
Source: PubMed Central journal article supplement (PMC3612389)
Supplement: NIHMS424673-supplement-supplement_1.pdf [file NIHMS424673-supplement-supplement_1.pdf]

**Figure 10.** LY 294002 blocks adiponectin-induced migration of Raw 264.7 macrophages.  $**P < 0.01$  vs vehicle controls;  $## P < 0.01$  vs APN-treated group.  $n=3$  in each group.

**Figure S1.** Inflammatory cells in the kidney express adiponectin. **A.** Representative photomicrographs of kidney sections stained for adiponectin (green), F4/80 (red), and DAPI (blue). **B.** Representative photomicrographs of kidney sections stained for adiponectin (green), CD11c (red), and DAPI (blue). **C.** Representative photomicrographs of kidney sections stained for adiponectin (green), CD3 (red), and DAPI (blue). **D.** Representative photomicrographs of kidney sections stained for adiponectin (green), MPO (red), and DAPI (blue).

**Figure S2.** **A.** Representative Western blot shows that the protein expression of adiponectin is induced in IRI kidneys of WT and APN-KO mice. **B.** Bar graph shows quantitative analysis of adiponectin protein expression in control kidneys and IRI kidneys of WT mice.  $* P < 0.05$  vs WT sham.  $n=5$  in each group.

**Figure S3.** Replacement of hematopoietic cells in the chimeric mice was confirmed by genotyping of genomic DNA from whole blood using PCR. PCR products are shown on ethidium bromide-stained agarose gels with the WT allele DNA at 850 bp and the mutated allele DNA at 500 bp.

Figure S1

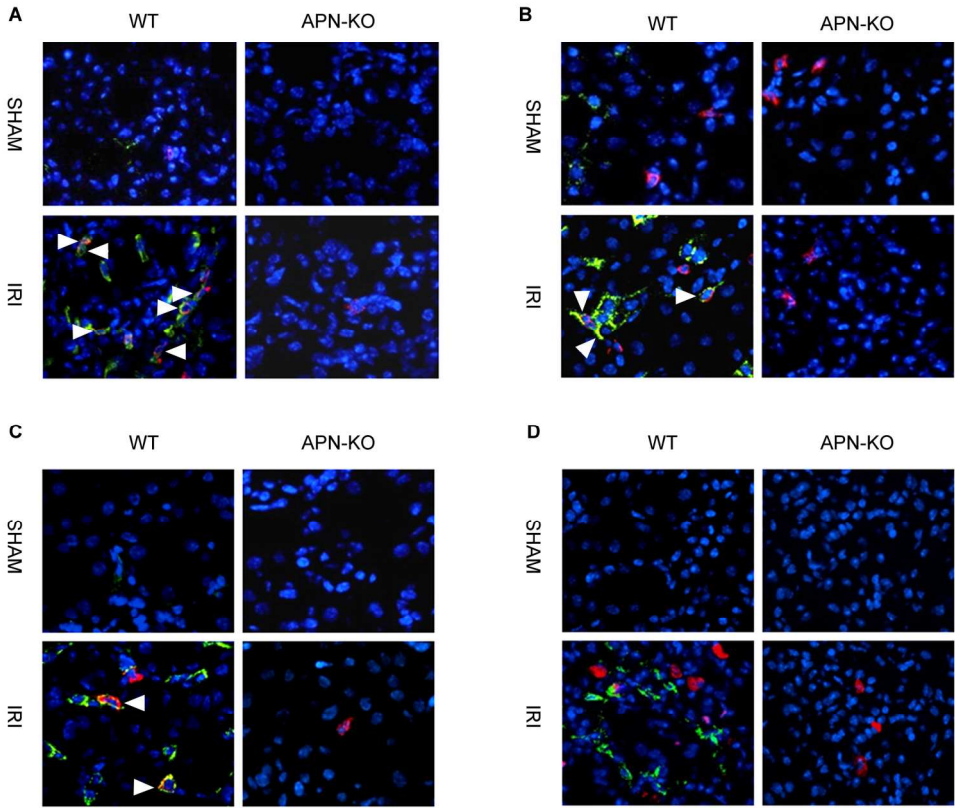

165x142mm (300 x 300 DPI)

Figure S2

A

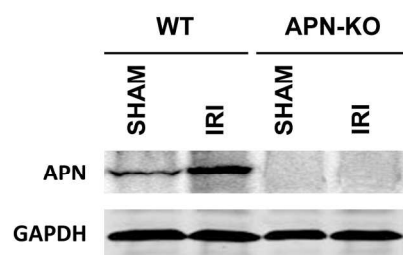

B

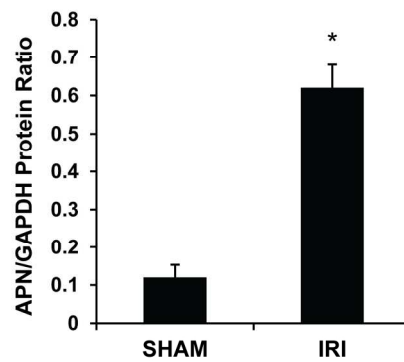

173x97mm (300 x 300 DPI)

Figure S3

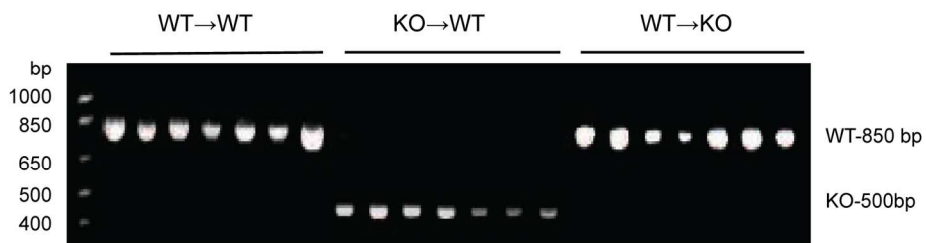

160x77mm (300 x 300 DPI)
